# Supplementary material
Source: PubMed Central journal article supplement (PMC470717)

IFN $\alpha$  (u/ml): 0 1 2 4 8 16 32 64 125 250 500 1000

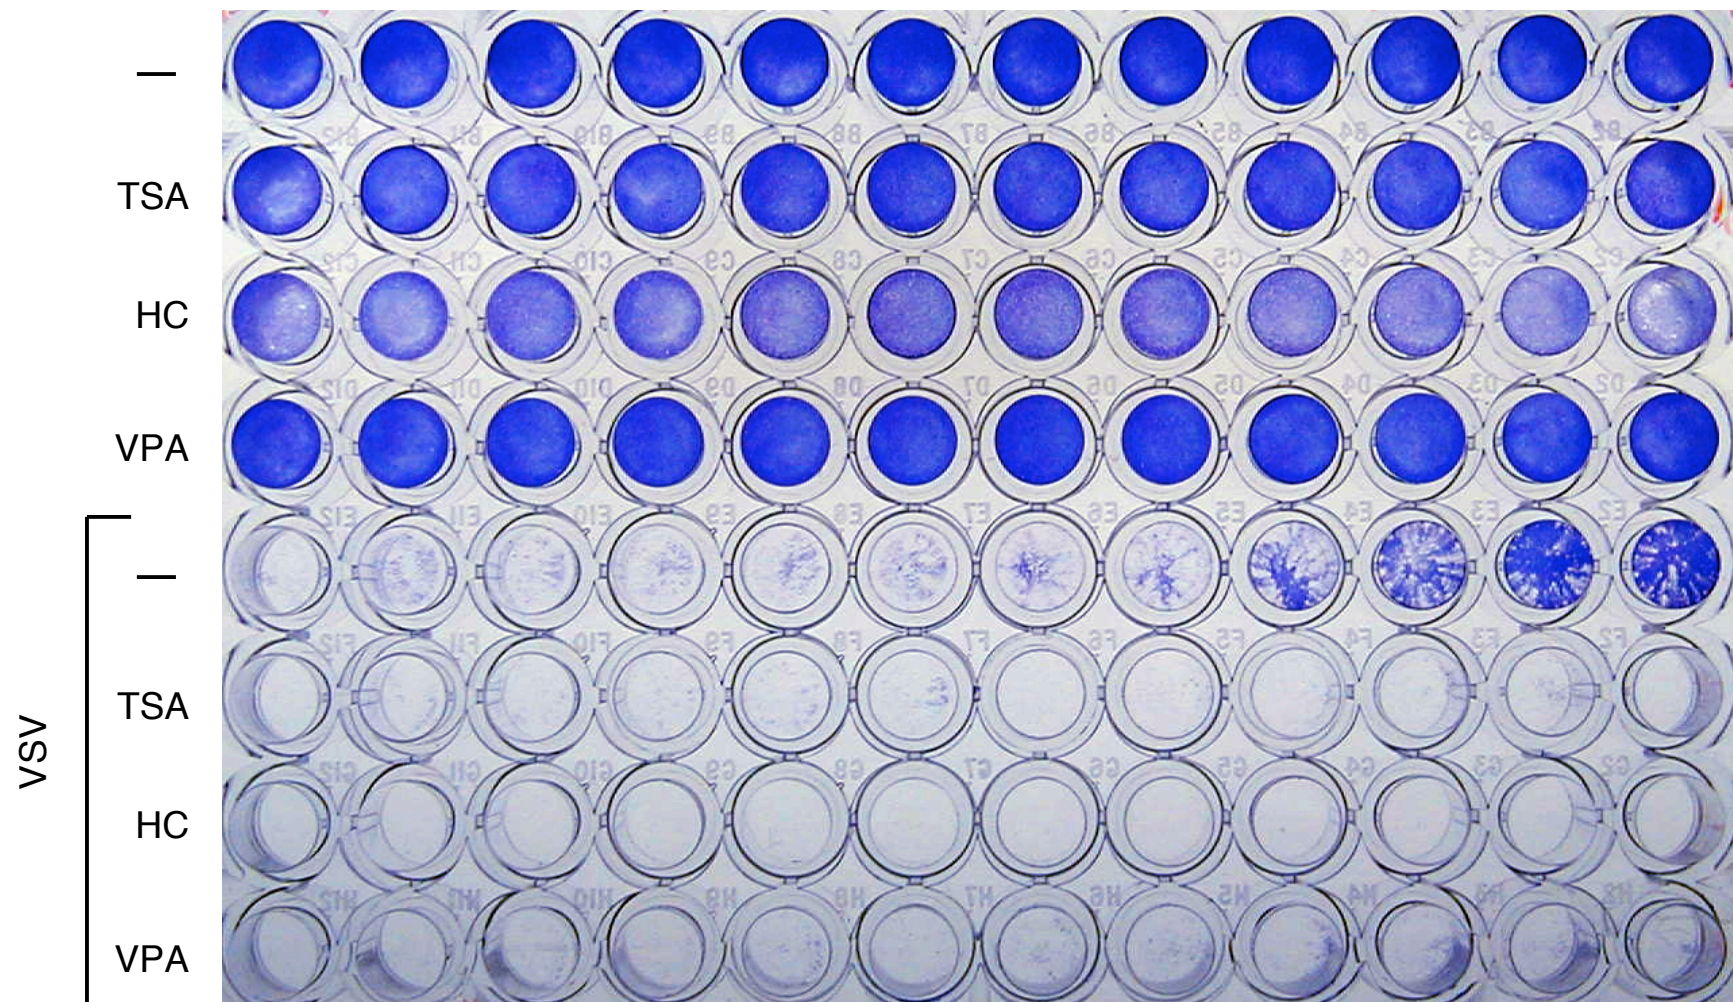

Supplement: pnas_101_26_9578__2.pdf [file pnas_101_26_9578__2.pdf]
